1 **An *Escherichia coli* Chassis for Production of Electrically Conductive Protein Nanowires**

2

3 Toshiyuki Ueki<sup>1,2\*</sup>, David J.F. Walker<sup>1,2\*</sup>, Trevor L. Woodard<sup>1</sup>, Kelly P. Nevin<sup>1</sup>, Stephen S.

4 Nonnenmann<sup>2,3</sup>, and Derek R. Lovley<sup>1,2\*</sup>

5

6 <sup>1</sup>Department of Microbiology, University of Massachusetts-Amherst, Amherst, MA, USA

7 <sup>2</sup>Institute for Applied Life Sciences, University of Massachusetts-Amherst

8 <sup>3</sup>Department of Mechanical and Industrial Engineering, University of Massachusetts-Amherst

9 \*Authors contributed equally

10

11 **Abstract**

12 *Geobacter sulfurreducens*' pilin-based electrically conductive protein nanowires (e-PNs) are a  
13 revolutionary electronic material. They offer novel options for electronic sensing applications  
14 and have the remarkable ability to harvest electrical energy from atmospheric humidity.  
15 However, technical constraints limit mass cultivation and genetic manipulation of *G.*  
16 *sulfurreducens*. Therefore, we designed a strain of *Escherichia coli* to express e-PNs by  
17 introducing a plasmid that contained an inducible operon with *E. coli* genes for type IV pili  
18 biogenesis machinery and a synthetic gene designed to yield a peptide monomer that could be  
19 assembled into e-PNs. The e-PNs expressed in *E. coli*, and harvested with a simple filtration  
20 method, had the same diameter (3 nm) and conductance as e-PNs expressed in *G.*  
21 *sulfurreducens*. These results, coupled with the robustness of *E. coli* for mass cultivation and the  
22 extensive *E. coli* toolbox for genetic manipulation, greatly expands opportunities for large-scale  
23 fabrication of novel e-PNs.

24

25 **Keywords:** Protein nanowire, e-pili, bioelectronic materials, e-biologics, *Geobacter*,  
26 sustainable electronics

27

## 28 Introduction

29 Electrically conductive protein nanowires (e-PNs) show promise as revolutionary,  
30 sustainably produced, and robust electronic materials<sup>1-8</sup>. They are biocompatible and can readily  
31 be adapted for a multitude of sensing applications<sup>1-7</sup>. Devices comprised of thin layers of e-PNs  
32 function as ‘humidity-powered electrical generators’, continuously harvesting energy in the form  
33 of electricity from atmospheric humidity<sup>8</sup>. However, the implementation of e-PNs in electronic  
34 devices has been limited due to a lack of methods for mass production. *In vitro* assembly of  
35 peptides into conductive nanofilaments is feasible<sup>9,10</sup>, but the filaments tend to agglomerate into  
36 gels at high peptide concentrations, limiting possibilities for large-scale fabrication. Furthermore,  
37 synthesis of the peptide monomers required for *in vitro* assembly is expensive, potentially  
38 limiting e-PN affordability.

39 *In vivo* assembly of e-PNs with microorganisms has several advantages over *in vitro*  
40 synthesis. Benefits include much lower cost and greater flexibility in e-PN design options with a  
41 production platform fueled with inexpensive, renewable feedstocks. A diversity of bacteria and  
42 archaea assemble peptides that show homology to bacterial type IV pilins into e-PNs<sup>11-15</sup>, but the  
43 e-PNs of *Geobacter sulfurreducens* have been most intensively investigated<sup>1, 16</sup>. *G.*  
44 *sulfurreducens* e-PNs can be fabricated *in vivo* with acetate as the carbon and energy source.  
45 Once the cells are grown, the e-PNs can be harvested, retaining their conductive properties<sup>12, 17-</sup>  
46 <sup>19</sup>.

47 The exquisite machinery that bacteria possess to assemble pilin proteins into filaments<sup>20</sup>  
48 confers great control over e-PN production, yielding a highly uniform product. The microbial  
49 assembly process also offers substantial opportunities for producing diverse, new types of e-PNs.  
50 For example, the conductivity of e-PNs produced with *G. sulfurreducens* has been tuned over a

51 million-fold with simple modifications to the *G. sulfurreducens* pilin gene to either increase or  
52 decrease the abundance of aromatic amino acids <sup>1, 16</sup>. Pilin genes can be designed to encode  
53 additional peptides at the carboxyl end of the pilin, yielding e-PNs that retain their conductivity  
54 and display the added peptides on the outer surface of the wires <sup>7</sup>. This peptide display along the  
55 wires offers unique possibilities for introducing peptide ligands to confer specific sensing  
56 functions to e-PN devices with a flexibility in sensor design not feasible with other materials  
57 such as carbon nanotubes or silicon nanowires <sup>7</sup>. Peptides displayed on the outer surface of e-  
58 PNs might also be designed to promote e-PN binding to surfaces to facilitate wire alignment or  
59 to function as chemical linkers with polymers for the fabrication of composite materials <sup>7</sup>.  
60 Synthetic gene circuits introduced to control the expression of multiple e-PN monomer genes  
61 within a single cell offer the possibility to further tune e-PN function by producing  
62 heterogeneous wires comprised of multiple types of e-PN monomers with the stoichiometry of  
63 each monomer type precisely controlled <sup>7</sup>. These design options would be difficult to replicate  
64 with *in vitro* assembly of e-PNs or fabrication of nanowires from non-biological materials.

65 *Geobacter*-fabricated e-PNs have several other advantages over traditional non-biological  
66 nanowire materials. Production of the e-PNs requires 100-fold less energy than is required for  
67 fabricating silicon nanowires or carbon nanotubes <sup>2</sup>. No toxic chemicals are required for e-PN  
68 fabrication and the final product is biocompatible, environmentally benign, and recyclable <sup>2</sup>. Yet,  
69 e-PNs are remarkably robust, maintaining function even under harsh CMOS-compatible  
70 fabrication conditions <sup>6</sup>. Proof-of-concept studies have demonstrated the dynamic sensing  
71 response of *Geobacter*-fabricated e-PNs; the ability of these e-PNs to function as the conductive  
72 component in flexible electronics; and that, in the appropriate electrode/e-PN configurations, thin  
73 films of *Geobacter* e-PNs can generate electricity from the humidity naturally present in air <sup>6-8</sup>.

74 18.

75 Barriers to large-scale e-PN production have been a limitation to realizing the potential of  
76 *Geobacter* e-PNs for these and other possible applications. *G. sulfurreducens* must be grown  
77 anaerobically to produce e-PNs. This requirement adds technical complexity and costs. A strain  
78 of *Pseudomonas aeruginosa*, grown aerobically, heterologously expressed the *G. sulfurreducens*  
79 pilin gene with the assembly of e-PNs with properties similar to the e-PNs expressed in *G.*  
80 *sulfurreducens*<sup>21</sup>. However, *P. aeruginosa* is a pathogenic microorganism and thus not ideal for  
81 large-scale commercial production of e-PNs. Furthermore, the expression of the e-PNs in *P.*  
82 *aeruginosa* remained under the control of the native regulatory system, limiting options for  
83 controlling the timing and extent of e-PN expression<sup>21</sup>.

84 We thought that *Escherichia coli* might be an ideal chassis for e-PN fabrication. *E. coli* is  
85 a common platform for the commercial scale production of organic commodities<sup>22, 23</sup>. The  
86 substantial *E. coli* genetic toolbox, including the possibility of introducing unnatural amino acids  
87<sup>24, 25</sup>, could provide broad options for designing e-PNs with different properties and functions.  
88 Non-pathogenic strains of *E. coli* typically do not express type IV pili. However, introduction of  
89 an artificial operon of pilus assembly protein genes from pathogenic *E. coli* into non-pathogenic  
90 *E. coli* yielded a non-pathogenic strain that expressed the same type IV pili that pathogenic *E.*  
91 *coli* express<sup>26</sup>. This finding, and the fact that bacteria will often assemble heterologous pilins  
92 into pili<sup>12, 13, 21, 27-29</sup>, suggested that it might be possible to develop a non-pathogenic strain of *E.*  
93 *coli* that would express *Geobacter* e-PNs.

94 Another limitation to large-scale *in vivo* production of e-PNs has been the methods for  
95 separating the e-PNs from cells. Previously described methods have included multiple laborious

96 steps, often with strategies such as ultracentrifugation and/or salt precipitation procedures that  
97 would be difficult to economically scale <sup>12, 17</sup>.

98 Here we report on the construction of a strain of *E. coli* amended with genes for the  
99 expression of type IV pili assembly machinery and a synthetic gene designed to yield e-PNs  
100 comparable to those produced by *G. sulfurreducens*. This strain produces e-PNs with  
101 characteristics similar to the e-PNs expressed by *G. sulfurreducens*. Simple aerobic growth of the  
102 *E. coli* designed for e-PN production, coupled with a new simplified method for harvesting e-  
103 PNs from cells, suggests that large-scale production of e-PNs will be feasible.

104

## 105 **Results and Discussion**

106 We engineered a standard lab strain of *E. coli* to produce e-PNs by introducing the genes  
107 known from previous studies <sup>26</sup> to be required for type IV pili biogenesis. We modified the  
108 previous design of *E. coli* <sup>26</sup>, which was constructed to produce pili from the *E. coli* pilin protein  
109 PpdD, as follows: 1) the gene for pilin monomer is within a separate cloning site to make it  
110 convenient to exchange the gene for the pilin of interest (Figure 1a); 2) the gene clusters were  
111 constructed with common and less expensive restriction enzymes to aid in modularity (Figure  
112 1b); 3) ribosome binding sites for *hofB*, *hofM*, and *ppdA* were changed to improve translation  
113 efficiency (Figure 1c); 4) a gene cluster containing *ppdA*, *ppdB*, *ygdB*, and *ppdC* and *gspO* were  
114 connected by 2-step PCR instead of using a restriction enzyme to delete unnecessary sequence  
115 (Figure 1b,d); 5) intergenic regions were shortened to delete unnecessary sequence (Figure 1d);  
116 6) the *tac* promoter <sup>30</sup>, one of the strongest promoters in *E. coli*, was incorporated to enhance  
117 transcription of the genes for the assembly of type IV pili (Figure 1b); and 7) a gene for the LacI  
118 repressor was included in the expression vector to repress the genes when desired, such as during

119 cloning (Figure 1a). We also deleted the gene *fimA* to prevent the formation of type I pili using  
 120 previously described genetic methods<sup>31, 32</sup>.

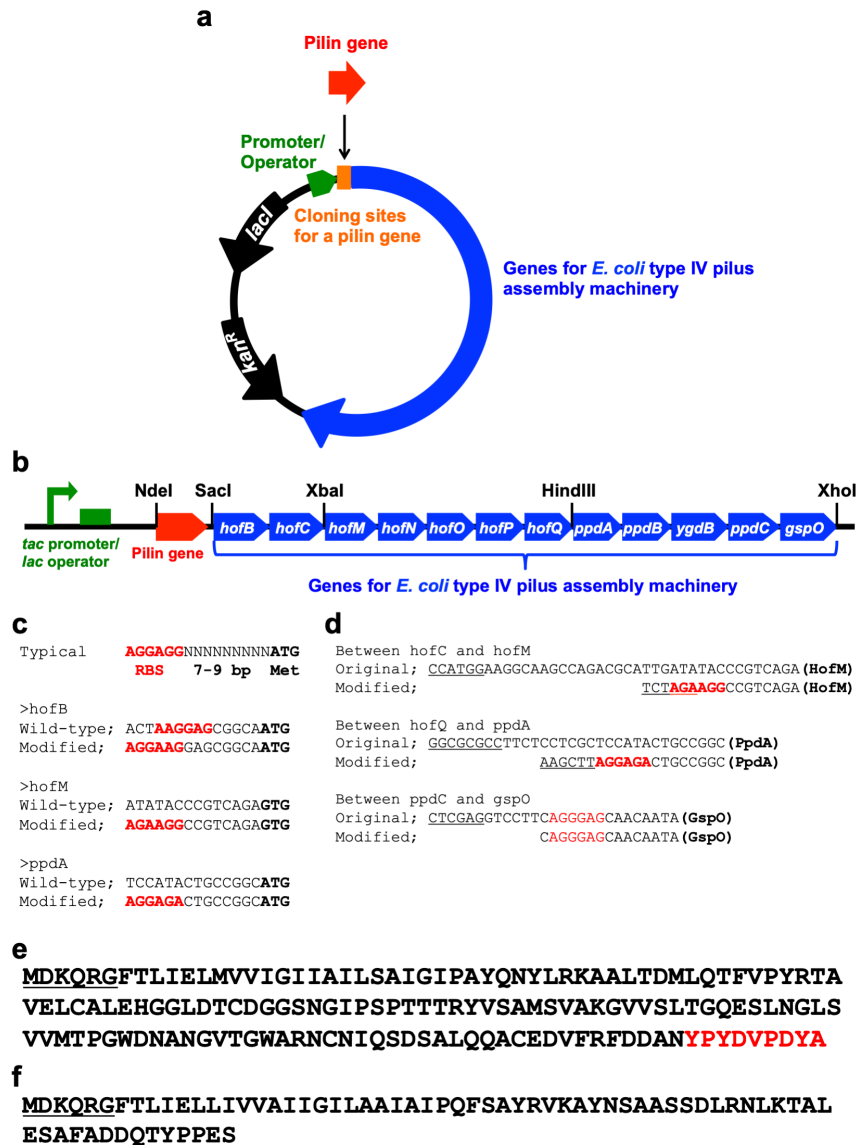

121  
 122 **Figure 1.** Construction of type IV pilus assembly system in *E. coli* and synthetic peptide  
 123 monomer for e-PN assembly. (a) Expression vector for genes for type IV pilus assembly  
 124 in *E. coli*. (*lacI*, Lac repressor gene; *kan<sup>R</sup>*, kanamycin resistance gene); (b) Gene  
 125 organization for *E. coli* type IV pilus assembly with cloning sites designated; (c)  
 126 Ribosome binding sites (designated in red) that were changed from those in previous

127 studies <sup>26</sup>; (d) Intergenic regions in the synthetic operon that were changed from those in  
128 previous studies <sup>26</sup> (ribosome binding sites in red, restriction enzyme sites underlined);  
129 (d) Amino acid sequence of the HA-tagged PpdD ( signal sequence underlined, HA tag  
130 sequence in red); (f) Amino acid sequence of the synthetic peptide monomer designed for  
131 assembly in e-PNs, which is a combination of a portion of the *G. sulfurreducens* pilin,  
132 PilA, with the *E. coli* PpdD signal sequence (underlined).

133  
134 The initial strain was constructed with a pilin gene that added the HA tag  
135 (YPYDVPDYA) at the carboxyl terminal end of the *E. coli* pilin protein PpdD (Figure 1e). With  
136 this modification the tagged pilin protein (PpdD-HA) could readily be detected with the  
137 commercially available antibody for the HA tag. PpdD-HA was detected in the cell extract from  
138 the strain containing the genes for PpdD-HA pilus assembly but not in extracts from a control  
139 strain that lacked the gene for PpdD-HA (Figure 2a). PpdD-HA pili were sheared from cells and  
140 PpdD-HA was detected in the sheared fraction from the strain containing the genes for PpdD-HA  
141 pilus assembly, but not from the control strain without the PpdD-HA gene (Figure 2a). These  
142 results confirmed that the modified expression system for type IV pilus assembly was effective  
143 for pili production.



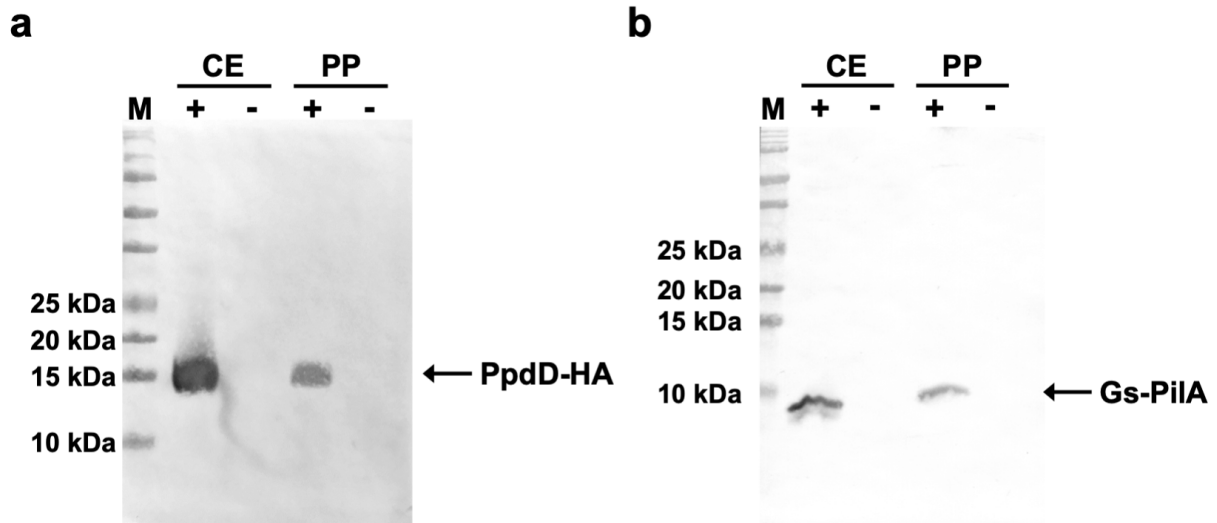

144

145 **Figure 2.** Expression of pili and e-PNs in *E. coli*. (a) Results with the strain of *E. coli*  
146 with genes for pilus assembly and the gene for PpdD-HA. (b) Results from *E. coli*  
147 strain GPN, which contained genes for pilus assembly and the gene for a synthetic pilin  
148 monomer designed to yield e-PNs assembled from a modified *G. sulfurreducens* PilA  
149 monomer. Western blot analyses of denatured proteins separated on an SDS PAGE gel  
150 and analyzed with antibody for (a) the HA tag on PpdD-HA pilin or (b) *G. sulfurreducens*  
151 PilA. Strains with the pilin genes designated with (+). Control strains without the pilin  
152 genes designated (-). Samples from whole cell extracts (CE) and the pili preparations  
153 (PP) were examined. Lanes designated M show molecular weight standard markers.

154

155 To express e-PNs similar to those expressed in *G. sulfurreducens* in *E. coli*, we designed  
156 a gene to yield a synthetic peptide monomer for assembly into e-PNs. The peptide was similar to  
157 the *G. sulfurreducens* pilin monomer, PilA, with the exception that the signal sequence was  
158 replaced with the *E. coli* PpdD signal sequence to facilitate e-PN assembly in *E. coli* (Figure 1f).  
159 The gene for the synthetic e-PN monomer was cloned into the location designated 'pilin gene'  
160 (Figure 1a). The strain with the synthetic gene for the e-PN monomer was designated *E. coli*

161 strain GPN (*Geobacter* protein nanowire). The e-PN monomer was detected in whole cell  
162 extracts of strain GPN with PilA antibody, but not in the control strain that lacked the gene for  
163 the e-PN monomer (Figure 2b).

164 e-PNs were harvested from strain GPN with physical shearing from the cells, as in  
165 previous studies of e-PNs expressed in *G. sulfurreducens*<sup>17</sup>. In those previous studies, the cells  
166 were separated from the sheared e-PNs with centrifugation and then the e-PNs in the supernatant  
167 were collected with ultracentrifugation or ammonium sulfate precipitation<sup>17</sup>. These methods of  
168 e-PN collection are labor intensive and will be difficult to adapt to large-scale production.  
169 Therefore, the e-PNs sheared from strain GPN and separated from cells were treated with Triton  
170 X100 detergent and then were collected on a filter with a 100 kDa molecular weight cutoff. This  
171 method is simpler and faster than previously described<sup>17</sup> e-PN purification methods.

172 The e-PNs harvested from *E. coli* strain GPN were ca. 3 nm in diameter and several  $\mu\text{m}$   
173 in length (Figure 3a), a morphology similar to the e-PNs expressed in *G. sulfurreducens*. No  
174 filaments were observed in similar preparations when the gene for the e-PN monomer was  
175 omitted from *E. coli* strain GPN. Denaturation of the e-PNs from *E. coli* strain GPN yielded a  
176 monomer that reacted with PilA antibody whereas the monomer was not detected in preparations  
177 from the control strain without the gene for the e-PN monomer (Figure 2b).

178 The conductance of thin films of the e-PNs from *E. coli* strain GPN, determined with a  
179 nanoelectrode array as previously described<sup>13</sup>, was  $3.26 \pm 0.35 \mu\text{S}$ , similar to the conductance of  
180  $3.39 \pm 0.04 \mu\text{S}$  for e-PNs harvested from *G. sulfurreducens* (Figure 3b). The conductance of  
181 these e-PNs was much higher than the conductance of wires harvested from strain Aro-5 (Figure  
182 3b), a strain of *G. sulfurreducens* that expresses a synthetic pilin gene designed to yield protein  
183 nanowires with low conductivity<sup>18,27</sup>.

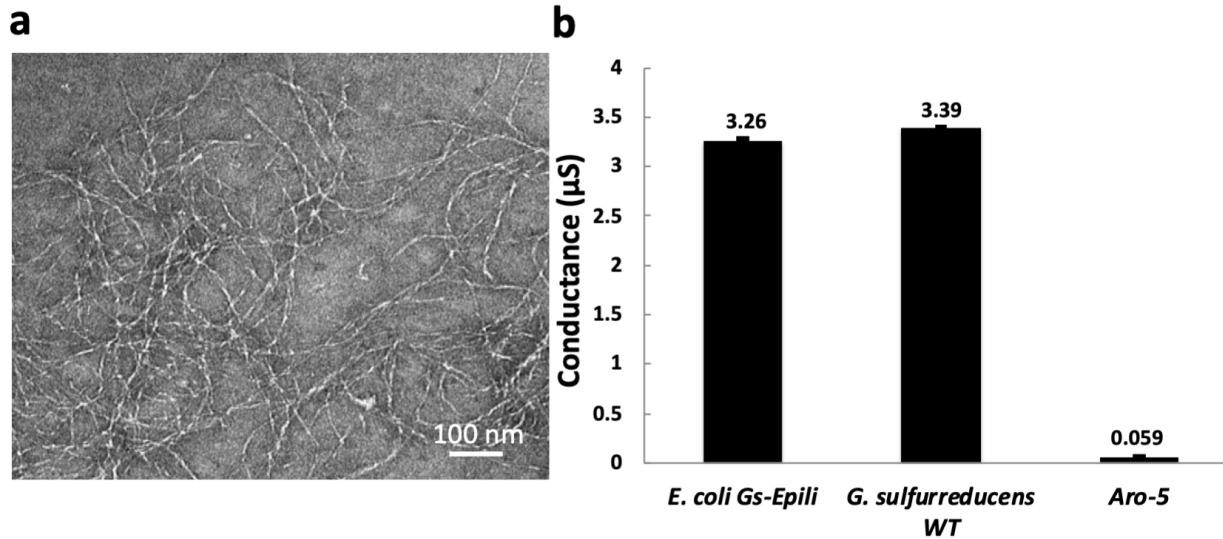

184

185 **Figure 3.** Characterization of the e-PNs expressed in *E. coli* strain GPN. (a)  
186 Transmission electron micrograph. (b) Conductance of films of e-PNs expressed in *E.*  
187 *coli* strain GPN compared with e-PNs from wild-type *Geobacter sulfurreducens* and the  
188 Aro-5 strain of *G. sulfurreducens*. The results are the means and standard deviation of  
189 triplicate measurements on each nanoelectrode array, and at least three independent  
190 nanoelectrode arrays. Results for wild-type *G. sulfurreducens* and strain Aro-5 were  
191 published previously<sup>13</sup>.

192

193 The conductance of individual e-PNs was evaluated on highly oriented pyrolytic graphite  
194 with atomic force microscopy employing a conductive tip, as previously described<sup>15</sup>. The  
195 diameter of the e-PNs was  $3 \pm 0.04$  nm (n=18; 6 measurements on 3 independent pili) the same  
196 as e-PNs expressed with *G. sulfurreducens* (Figure 4). The e-PNs were conductive with an  
197 ohmic-like current-voltage response (Figure 4d). The conductance of the individual e-PNs,  $4.3 \pm$   
198  $0.8$  nS (n=9), compared well with the previously reported<sup>15</sup> conductance of  $4.5 \pm 0.3$  nS for  
199 individual e-PNs expressed in *G. sulfurreducens*.

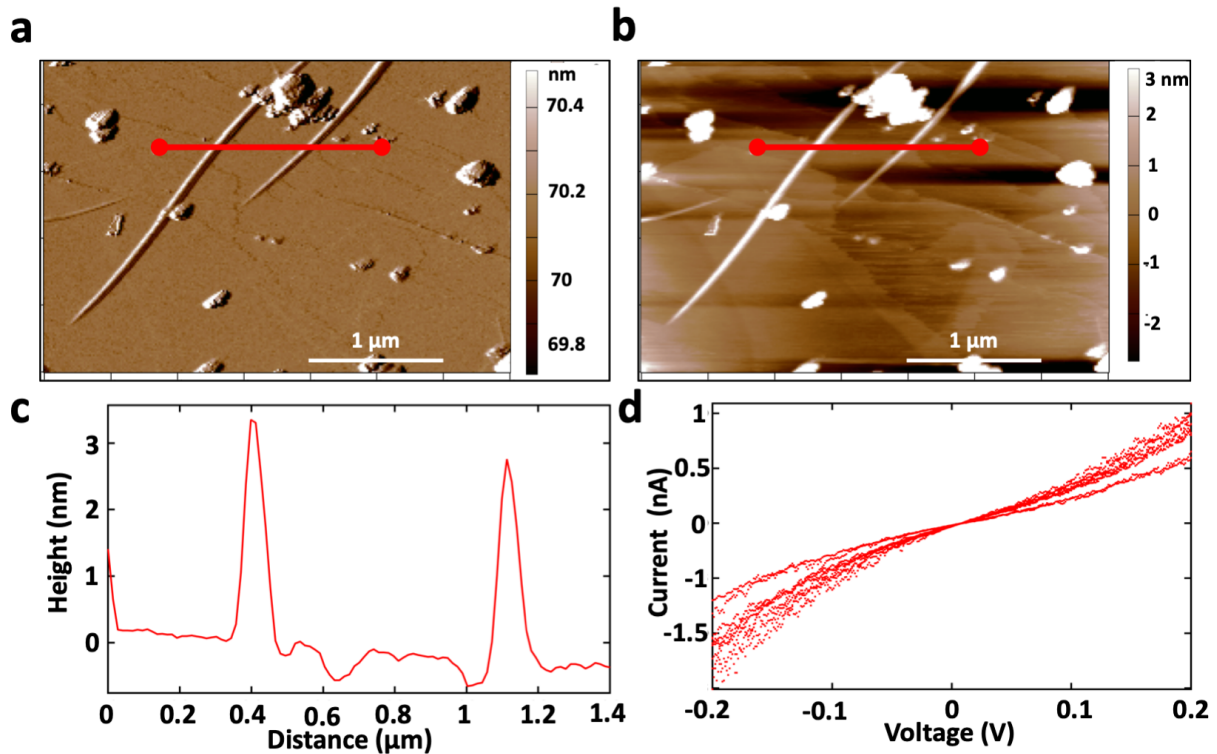

200

201 **Figure 4.** Characterization of individual e-PNs expressed in *E. coli* strain GPN. (a)

202 Amplitude image of 2 e-PNs in amplitude modulation mode (b) Height image of each

203 e-PN (c) Cross-section line trace showing the height of 2 individual e-PNs, designated in

204 panel a and b by the redline, demonstrating ~3 nm height (diameter). (d) Current voltage

205 response of nine individual measurements (3 measurements on 3 e-PNs).

206

## 207 Conclusions

208 The fabrication of e-PNs with *E. coli* offers substantial advantages over expression in *G.*

209 *sulfurreducens*. Special equipment and expertise is required to anaerobically culture *G.*

210 *sulfurreducens*, whereas *E. coli* can be simply grown under ambient, aerobic atmospheric

211 conditions. When coupled with our finding that the e-PNs can be collected with simple filtration

212 method, expression of e-PNs in *E. coli* offers the potential for large-scale e-PN production.

213 Furthermore, e-PN expression in *E. coli* offers much greater flexibility for the design of a  
214 wider diversity of e-PNs than would currently be possible with *G. sulfurreducens*. Tools for the  
215 genetic manipulation of *G. sulfurreducens* are limited and only the most simple synthetic gene  
216 circuits have been adapted for this organism <sup>33</sup>. The much broader range of strategies for  
217 introducing genes and controlling their expression in *E. coli* <sup>22, 23</sup> is expected to enable the design  
218 and expression of e-PNs with unique properties and functionalities that could not readily be  
219 fabricated with *G. sulfurreducens*. Most notably, *E. coli* is an excellent platform for modifying  
220 proteins with unnatural amino acids that can confer diverse new functionalities to proteins <sup>24, 25</sup> .  
221 The development of new e-PNs in the *E. coli* chassis for enhanced sensor, electronics, and  
222 energy-harvesting applications <sup>1-8</sup> is underway.

223

## 224 **Materials and Methods**

### 225 ***E. coli* strain and culture conditions**

226 *E. coli* NEB 10-beta (New England Biolabs) was grown at 37 °C in LB medium  
227 supplemented with appropriate antibiotics as necessary for plasmid preparation, as previously  
228 described <sup>34</sup>. The gene for FimA, the primary monomer for type I pili, was deleted as previously  
229 described <sup>31, 32</sup> to construct *E. coli*  $\Delta$ *fimA* (kanamycin sensitive). The strains expressing the  
230 modified *E. coli* pilin or the synthetic peptide for assembly into e-PNs were built in this strain.

### 231 **Construction of expression vector for type IV pilus assembly**

232 An expression vector for type IV pilus assembly was constructed as described previously  
233 <sup>26</sup> with several modifications (Figure 1). To construct the basic expression vector for type IV  
234 pilus assembly the T7 promoter in the plasmid vector pET24b (Novagen) was replaced with *tac*  
235 promoter <sup>30</sup>. The DNA fragment containing *tac* promoter and *lac* operator was amplified by PCR

236 with a primer pair, Ptac-F/Olac-R (Table S1) and pCD341<sup>35</sup> as template. The PCR product was  
237 digested with BglIII and XbaI and replaced the BglIII-XbaI region containing T7 promoter and *lac*  
238 operator in pET24b. The resultant plasmid was designated p24Ptac.

239 Next, genes for *E. coli* type IV pilus assembly without the major pilin gene were cloned  
240 in p24Ptac. The genes include *hofB* (ATPase), *hofC* (platform protein), *hofM* (assembly protein),  
241 *hofN* (assembly protein), *hofO* (assembly protein), *hofP* (assembly protein), *hofQ* (secretin),  
242 *ppdA* (minor pilin), *ppdB* (minor pilin), *ygdB* (minor pilin), *ppdC* (minor pilin), and *gspO*  
243 (prepilin peptidase)<sup>26</sup>. DNA fragment containing *ppdA*, *ppdB*, *ygdB*, *ppdC*, and *gspO* was  
244 prepared by 2-step PCR. Fragments containing *ppdA*, *ppdB*, *ygdB*, and *ppdC*, or *gspO* were  
245 amplified by PCR with primer pairs, *ppdA*-F/*ppdC*-R and *gspO*-F/*gspO*-R (Table S1),  
246 respectively. The fragment containing *ppdA*, *ppdB*, *ygdB*, *ppdC*, and *gspO* was amplified by PCR  
247 with these PCR products as template and a primer pair, *ppdA*-F/*gspO*-R. The PCR product was  
248 digested with HindIII and XhoI and cloned in pBluescript II SK (Stratagene). The fragment  
249 containing *hofM*, *hofN*, *hofO*, *hofP*, and *hofQ* was amplified by PCR with the primer pair, *hofM*-  
250 F/ *hofQ*-R (Table S1). The PCR product was digested with XbaI and HindIII and cloned in the  
251 plasmid containing *ppdA*, *ppdB*, *ygdB*, *ppdC*, and *gspO*. The fragment containing *hofB* and *hofC*  
252 was amplified by PCR with a primer pair, *hofB*-F/*hofC*-R (Table S1). The PCR product was  
253 digested with SacI and XbaI and cloned in the plasmid containing *hofM*, *hofN*, *hofO*, *hofP*, *hofQ*,  
254 *ppdA*, *ppdB*, *ygdB*, *ppdC*, and *gspO*. Fragment containing *hofB*, *hofC*, *hofM*, *hofN*, *hofO*, *hofP*,  
255 *hofQ*, *ppdA*, *ppdB*, *ygdB*, *ppdC*, and *gspO* was prepared by digesting the plasmid containing  
256 *hofB*, *hofC*, *hofM*, *hofN*, *hofO*, *hofP*, *hofQ*, *ppdA*, *ppdB*, *ygdB*, *ppdC*, and *gspO* with SacI and  
257 XhoI and cloned in p24Ptac (Figure 1). The resultant plasmid was designated T4PAS/p24Ptac.

258 **Expression and harvesting of pili comprised of the *E. coli* pilin PpdD**

259 The fragment containing a gene for PpdD with HA tag (Figure 1e) was amplified with a  
260 primer pair, ppdD-F/ppdD-HA-R (Table S1), digested with NdeI and SacI, and cloned in  
261 T4PAS/p24Ptac. The resultant plasmid was termed ppdD-HA/T4PAS/p24Ptac.  
262 For initial studies with the *E. coli* strain expressing the *E. coli* pilin PpdD, the plasmids ppdD-  
263 HA/T4PAS/p24Ptac or T4PAS/p24Ptac were transformed into *E. coli*  $\Delta fimA$ . A single colony  
264 from LB agar plate containing kanamycin<sup>34</sup> was inoculated in TB medium (Novagen)  
265 supplemented with 1% glycerol and kanamycin and incubated at 30° C for 24 h to the stationary  
266 phase. Pili were sheared from cells and precipitated with TCA as described previously<sup>26</sup>.

### 267 **Expression and harvesting of e-PNs**

268 A fragment encoding a gene for a synthetic pilin monomer, which was similar to the PilA  
269 monomer of *G. sulfurreducens* but included the signal sequence of PpdD instead of the original  
270 PilA signal sequence (Figure 1f), was amplified with a primer pair, EPS-GspilA-F/GspilA-R  
271 (Table S1). The amplified fragment was digested with NdeI and SacI and cloned in  
272 T4PAS/p24Ptac. The resultant plasmid, designated GspilA/T4PAS/p24Ptac, was transformed  
273 into *E. coli*  $\Delta fimA$ . The resultant strain, designated *E. coli* strain GPN (*Geobacter* protein  
274 nanowires) was grown on 10 cm diameter culture plates of standard LB medium<sup>34</sup> amended with  
275 kanamycin, and solidified with agar. After overnight growth at 30 °C, cells were scraped from  
276 the surface and suspended in 6 ml of M9 media<sup>34</sup>. Twenty plates of M9 medium supplemented  
277 with 0.5% glycerol, 0.5 mM IPTG, and kanamycin were spread-plated with 300  $\mu$ l of the  
278 suspended cells. The plates were incubated at 30 °C for 48 hours. Cells were harvested from the  
279 plates with 1 ml of M9 media (500  $\mu$ l to scrape, 500  $\mu$ l to wash) for each plate. The 20 ml  
280 suspension of cell scrapings was centrifuged at 4000 rpm for 15 minutes at 4 °C to pellet the  
281 cells. The supernatant was discarded and the cells were resuspended in 30 ml of 150 mM

282 ethanolamine (pH 10.5) buffer and poured into a Waring blender. The tubes were washed three  
283 times with 20 ml of the ethanolamine buffer, which was also added to the blender. The 90 ml  
284 suspension was blended for 2 minutes on low speed. The contents of the blender were transferred  
285 to a centrifuge bottle along with a wash of the blender with 10 ml of ethanolamine buffer. The  
286 blended material was centrifuged at 5000 x g for 30 minutes at 4°C. The supernatant was  
287 collected. Triton X100 detergent was added to provide a final concentration of 6 mM. The  
288 mixture was shaken at 100 rpm at room temperature for 45 minutes then added to a stirring  
289 filtration unit that had a 100 kDa molecular weight cutoff membrane filter made from  
290 polyethersulfone (Omega membrane 100K 76 mm, Pall Corporation). Additional ethanolamine  
291 buffer was added to dilute the sample to yield a final Triton X100 concentration of 2 mM. The  
292 sample was filtered under nitrogen gas (69 kPa). The sample on the filter was washed four times  
293 with 100 ml of water. The e-PNs were collected from the filter by scrapping the surface into 500  
294  $\mu$ l of water. The scrapping procedure was repeated two more times to yield a suspension of e-  
295 PNs in 1.5 ml of water.

## 296 **Western blot analysis**

297 The presence of pilin monomers in whole cell extracts and pili preparations was  
298 evaluated with Western blot analysis. Whole cell extracts were prepared with B-PER Complete  
299 Bacterial Protein Extraction Reagent (Thermo Fisher Scientific). Western blot analysis was  
300 conducted as described previously <sup>7</sup>. PpdD-HA pilin was detected with an anti-HA antibody (HA  
301 Tag Polyclonal Antibody, Invitrogen). The *G. sulfurreducens* pilin monomer, PilA, was detected  
302 with an anti-PilA antibody <sup>7</sup>.

## 303 **Protein Nanowire Conductance**



304 The conductance of e-PNs expressed in *E. coli* from the *G. sulfurreducens* pilin was  
305 analyzed as previously described<sup>13, 15</sup>. The e-PN preparation in water was adjusted to 500 µg  
306 protein per µl. As previously described<sup>13</sup>, a 2 µl aliquot of the e-PN preparation was dropcast  
307 onto the center of three different gold electrode nanoarrays and allowed to dry for 1 hour at 24  
308 °C, after which another 2 µl was dropcast and left to dry overnight at 24 °C. Each of the three  
309 electrodes nanoarrays was analyzed with a Keithley 4200 Semiconductor Characterization  
310 System setup with four probes to conduct a current-voltage (I-V) curve using a  $\pm 30 \times 10^{-8}$  V  
311 sweep with a 5s delay and a 250s hold time. The analyses on each of the three nanoarrays were  
312 repeated in triplicate. Thin film conductance was calculated by extracting the slope of the linear  
313 fit of the current-voltage response for each of the three measurements on the three electrodes  
314 using the formula;  $G= I/V$ , where  $G$  is the conductance,  $I$  is the current and  $V$  is the voltage.

315 In order to evaluate the conductance of individual e-PNs, 100 µl aliquot of a culture of *E.*  
316 *coli* expressing the *G. sulfurreducens* pilin was dropcast onto highly oriented pyrolytic graphite  
317 (HOPG) and allowed to sit for 10 minutes. Then the excess liquid was wicked away with a  
318 Kimwipe, and an equal volume of deionized water was added to wash off excess salts etc.,  
319 blotted dry, then dried for 12 hours at 24 °C. Samples were loaded into an Oxford Instruments  
320 Cypher ES Environmental AFM and equilibrated for at least 2 hours. The AFM was operated in  
321 ORCA electrical mode with a Pt/Ir- coated Arrow-ContPT tip with a 0.2 N/m force constant  
322 (NanoWorld AG, Neuchâtel, Switzerland). e-PNs were identified in Amplitude Mapping mode  
323 (AM-AFM). Point mode current-voltage spectroscopy was carried out by switching to contact  
324 mode and gently touching the conductive tip, which was acting as a translatable top electrode, to  
325 the top of the e-PN with a force of 1 nN. A voltage sweep of  $\pm 0.6$  V set at 0.99 Hz was applied

326 to three independent points on each of three individual e-PNs. The conductance was calculated,  
327 as above, from the slope of the linear fit of the current-voltage response between -0.2 and 0.2 V.

## 328 References

- 329 1. Lovley, D. R., Electrically conductive pili: biological function and potential applications  
330 in electronics. *Curr. Opin. Electrochem.* **2017**, *4*, 190-198.
- 331 2. Lovley, D. R., e-Biologics: Fabrication of sustainable electronics with ‘green’ biological  
332 materials. *mBio* **2017**, *8*, e00695-17.
- 333 3. Gutermann, T.; Gazit, E., Toward peptide-based bioelectronics: reductionist design of  
334 conductive pili mimetics. *Bioelectronics in Medicine* **2018**, *1*, 131-137.
- 335 4. Creasey, R. C. G.; Mostert, A. B.; Nguyen, T. A. H.; Viridis, B.; Freguia, S.; Laycock,  
336 B., Microbial nanowires –electron transport and the role of synthetic analogues *Acta Biomater.*  
337 **2018**, *69*, 1-30.
- 338 5. Ing, N. L.; El-Naggar, M. Y.; Hochbaum, A. I., Going the distance: long-range  
339 conductivity in protein and peptide bioelectronic materials. *J. Phys. Chem. B* **2018**, *122*, 1043-  
340 10423.
- 341 6. Sun, Y.-L.; Tang, H.-Y.; Ribbe, A.; Duzhko, V.; Woodard, T. L.; Ward, J. E.;  
342 Nevin, K. P.; Nonnenmann, S.; Russell, T. P.; Emrick, T.; Lovley, D. R., Conductive  
343 composite materials fabricated with microbially produced protein nanowires. *Small* **2018**, *14*,  
344 1802624.
- 345 7. Ueki, T.; Walker, D. J. F.; Tremblay, P.-L.; Nevin, K. P.; Ward, J. E.; Woodard, T. L.;  
346 Nonnenmann, S. S.; Lovley, D. R., Decorating the outer surface of microbially produced protein  
347 nanowires with peptides. *ACS Synthetic Biology* **2019**, *8*, 1809-1817.
- 348 8. Liu, X.; Gao, H.; Ward, J. E.; Liu, X.; Yin, B.; Fu, T.; Chen, J.; Lovley, D. R.; Yao,  
349 J., Sustained electric power generation from ambient humidity (*manuscript submitted*).
- 350 9. Creasey, R. C. G.; Shingaya, Y.; Nakayama, T., Improved electrical conductance  
351 through self-assembly of bioinspired peptides into nanoscale fibers. *Materials Chemistry and*  
352 *Physics* **2015**, *158*, 52-59.
- 353 10. Ing, N. L.; Spencer, R. K.; Luong, S. H.; Nguyen, H. D.; Hochbaum, A. I., Electronic  
354 conductivity in biomimetic  $\alpha$  - helical peptide nanofibers and gels. *ACS Nano* **2018**, *12*, 2652-  
355 2661.
- 356 11. Reguera, G.; McCarthy, K. D.; Mehta, T.; Nicoll, J. S.; Tuominen, M. T.; Lovley, D.  
357 R., Extracellular electron transfer via microbial nanowires. *Nature* **2005**, *435*, 1098-1101.
- 358 12. Tan, Y.; Adhikari, R. Y.; Malvankar, N. S.; Ward, J. E.; Woodard, T. L.; Nevin, K. P.;  
359 Lovley, D. R., Expressing the *Geobacter metallireducens* PilA in *Geobacter sulfurreducens*  
360 yields pili with exceptional conductivity. *mBio* **2017**, *8*, e02203-16.
- 361 13. Walker, D. J. F.; Adhikari, R. Y.; Holmes, D. E.; Ward, J. E.; Woodard, T. L.; Nevin,  
362 K. P.; Lovley, D. R., Electrically conductive pili from genes of phylogenetically diverse  
363 microorganisms. *ISME J.* **2018**, *12*, 48-58.
- 364 14. Walker, D. J. F.; Nevin, K. P.; Nonnenmann, S. S.; Holmes, D. E.; Woodard, T. L.;  
365 Ward, J. E.; Rotaru, A.-E.; McInerney, M. J.; Lovley, D. R., *Syntrophus* conductive pili  
366 demonstrate that common hydrogen-donating syntrophs can have a direct electron transfer option  
367 *bioRxiv* **2018**, <https://www.biorxiv.org/content/10.1101/479683v2>.

- 368 15. Walker, D. J. F.; Martz, E.; Holmes, D. E.; Zhou, Z.; Nonnenmann, S. S.; Lovley, D.  
369 R., The archaeum of *Methanospirillum hungatei* is electrically conductive. *mBio* **2019**, *10*,  
370 e00579-19.
- 371 16. Lovley, D. R.; Walker, D. J. F., *Geobacter* protein nanowires. *Frontiers in microbiology*  
372 **2019**, *10*, 2078.
- 373 17. Malvankar, N. S.; Vargas, M.; Nevin, K. P.; Franks, A. E.; Leang, C.; Kim, B.-C.;  
374 Inoue, K.; Mester, T.; Covalla, S. F.; Johnson, J. P.; Rotello, V. M.; Tuominen, M. T.; Lovley,  
375 D. R., Tunable metallic-like conductivity in nanostructured biofilms comprised of microbial  
376 nanowires. *Nature Nanotechnology* **2011**, *6*, 573-579.
- 377 18. Adhikari, R. Y.; Malvankar, N. S.; Tuominen, M. T.; Lovley, D. R., Conductivity of  
378 individual *Geobacter pili*. *RSC Advances* **2016**, *6*, 8354-8357.
- 379 19. Tan, Y.; Adhikari, R. Y.; Malvankar, N. S.; Pi, S.; Ward, J. E.; Woodard, T. L.;  
380 Nevin, K. P.; Xia, Q.; Tuominen, M. T.; Lovley, D. R., Synthetic biological protein nanowires  
381 with high conductivity. *Small* **2016**, *12*, 4481-4485.
- 382 20. Hospenthal, M. K.; Costa, T. R. D.; Waksman, G., A comprehensive guide to pilus  
383 biogenesis in Gram-negative bacteria. *Nature Reviews Microbiology* **2017**, *15*, 365-379.
- 384 21. Liu, X.; Wang, S.; Xu, A.; Zhang, L.; Liu, H.; Ma, L. Z., Biological synthesis of high-  
385 conductive pili in aerobic bacterium *Pseudomonas aeruginosa*. *Appl. Microbiol. Biotechnol.*  
386 **2019**, *103*, 1535-1544.
- 387 22. Pontrelli, S.; Chiu, T. Y.; E.I., L.; F.Y., C.; Chang, P.; J.C., L., *Escherichia coli* as a  
388 host for metabolic engineering *Metabolic Engineering* **2018**, *50*, 16-46.
- 389 23. K.R., C.; J.H., S.; J.S., C.; D., Y.; S.Y., L., *Systems metabolic engineering of*  
390 *Escherichia coli*. *EcoSal Plus* **2016**, *2016*, doi:10.1128/ecosalplus.ESP-0010-2015.
- 391 24. Wals, K.; Ovaa, H., Unnatural amino acid incorporation in *E. coli*: current and future  
392 applications in the design of therapeutic proteins. *Front Chem* **2014**, *2*, 15.
- 393 25. Smolskaya, S.; Andreev, Y. A., Site-specific incorporation of unnatural amino acids into  
394 *Escherichia coli* recombinant protein: methodology development and recent achievement.  
395 *Biomolecules* **2019**, *9*, 255.
- 396 26. Luna Rico, A.; Zheng, W.; Petiot, N.; Egelman, E. H.; Francetic, O., Functional  
397 reconstitution of the type IVa pilus assembly system from enterohaemorrhagic *Escherichia coli*.  
398 *Molecular Microbiology* **2019**, *111*, 732-749.
- 399 27. Vargas, M.; Malvankar, N. S.; Tremblay, P.-L.; Leang, C.; Smith, J. A.; Patel, P.;  
400 Snoeyenbos-West, O.; Nevin, K. P.; Lovley, D. R., Aromatic amino acids required for pili  
401 conductivity and long-range extracellular electron transport in *Geobacter sulfurreducens* *mBio*  
402 **2013**, *4*, e00105-13. .
- 403 28. Liu, X.; Tremblay, P.-L.; Malvankar, N. S.; Nevin, K. P.; Lovley, D. R.; Vargas, M., A  
404 *Geobacter sulfurreducens* strain expressing *Pseudomonas aeruginosa* type IV pili localizes  
405 OmcS on pili but Is deficient in Fe(III) oxide reduction and current production. *Appl Environ*  
406 *Microbiol* **2014**, *80*, 1219-1224.
- 407 29. Tan, Y.; Adhikari, R. Y.; Malvankar, N. S.; Ward, J. E.; Nevin, K. P.; Woodard, T. L.;  
408 Smith, J. A.; Snoeyenbos-West, O. L.; Franks, A. E.; Tuominen, M. T.; Lovley, D. R., The low  
409 conductivity of *Geobacter uraniireducens* pili suggests a diversity of extracellular electron  
410 transfer mechanisms in the genus *Geobacter*. *Frontiers in microbiology* **2016**, *7*, 980.
- 411 30. de Boer, H. A.; Comstock, L. J.; Vasser, M., The tac promoter: a functional hybrid  
412 derived from the trp and lac promoters *Proc Natl Acad Sci U S A* **1983**, *80*, 21-25.

- 413 31. Datsenko, K. A.; Wanner, B. L., One-step inactivation of chromo-  
414 *Escherichia coli* K-12 using PCR products. *Proc Natl Acad Sci U S A* **2000**, *97*, 6640–6645.
- 415 32. Baba, T.; Ara, T.; Hasegawa, M.; Takai, Y.; Okumura, Y.; Baba, M.; Datsenko, K.  
416 A.; Tomita, M.; Wanner, B. L.; Mor, i. H., Construction of *Escherichia coli* K-12 in-frame,  
417 single-gene knockout mutants: the Keio collection. *Molecular Systems Biology* **2006**, *2*, 1-11.
- 418 33. Ueki, T.; Nevin, K. P.; Woodard, T. L.; Lovley, D. R., Genetic switches and related  
419 tools for controlling gene expression and electrical outputs of *Geobacter sulfurreducens*. *J. Ind.*  
420 *Microbiol. Biotechnol.* **2016**, *43*, 1561-1575.
- 421 34. Miller, J. H., *Experiments in molecular genetics*. Cold Spring Harbor Press: New York,  
422 1972.
- 423 35. Dehio, M.; Knorre, A.; Lanz, C.; Dehio, C., Construction of versatile high-level  
424 expression vectors for *Bartonella henselae* and the use of green fluorescent protein as a new  
425 expression marker. *Gene* **1998**, *215*, 223-229.
- 426
